# Supplementary material for: Influence of the neck length of urease-powered flask-like colloidal motors on their kinematic behavior
Source: Royal Society of Chemistry journal article supplement (doi:10.1039/d4sm01294a), 2025-01-01
Supplement: d4sm01294a1.pdf [file d4sm01294a1.pdf]

# Influence of the Neck Length of Urease-powered Flasklike Colloidal Motors on Their Kinematic Behavior

Chang Zhou,<sup>ab</sup> Yingjie Wu,<sup>\*a</sup> Tiejian Si,<sup>a</sup> Kangning Zhu,<sup>b</sup> Mingcheng Yang<sup>\*c</sup> and Qiang He<sup>\*a</sup>

<sup>a</sup> School of Medicine and Health, Harbin Institute of Technology, XiDaZi Street 92, Harbin 150001, China

<sup>b</sup> Wenzhou Institute, University of Chinese Academy of Sciences, 1 Jinlian Street, Wenzhou 325000, China

<sup>c</sup> Beijing National Laboratory for Condensed Matter Physics and Laboratory of Soft Matter Physics, Institute of Physics, Chinese Academy of Sciences, Beijing 100190, China; School of Physical Sciences, University of Chinese Academy of Sciences, Beijing 100049, China; Songshan Lake Materials Laboratory, Dongguan, Guangdong 523808, China

## Table of contents

**Figure S1.** The average speed of the flasklike colloidal motors with different neck lengths in the solution with different urea concentrations.

**Figure S2.** Translational (a) and rotational (b) diffusion coefficient of the Brownian motion of flasklike colloidal particles with different neck lengths in different urea concentrations.

**Video S1.** Trajectories of the short-necked flasklike colloidal motors (N100nm) in 25 mM urea solution in 2 s.

**Video S2.** Trajectories of the medium-necked flasklike colloidal motors (N300nm) in 25 mM urea solution in 2 s.

**Video S3.** Trajectories of the long-necked flasklike colloidal motors (N600nm) in 25 mM urea solution in 2 s.

**Video S4.** The tumbling motion of the short-necked flasklike colloidal motors (N100nm) in 25 mM urea solution in 7 s.

**Video S5.** The turning motion of the medium-necked flasklike colloidal motors (N300nm) in 25 mM urea solution in 7 s.

**Video S6.** The ballistic motion of the long-necked flasklike colloidal motors (N600nm) in 25 mM urea solution in 7 s.

**Video S7.** The tumbling motion of multiple short-necked flasklike colloidal motors (N100nm) in 25 mM urea solution in 7 s.

**Video S8.** The turning motion of multiple medium-necked flasklike colloidal motors (N300nm) in 25 mM urea solution in 7 s.

**Video S9.** The ballistic motion of multiple long-necked flasklike colloidal motors (N600nm) in 25 mM urea solution in 7 s.

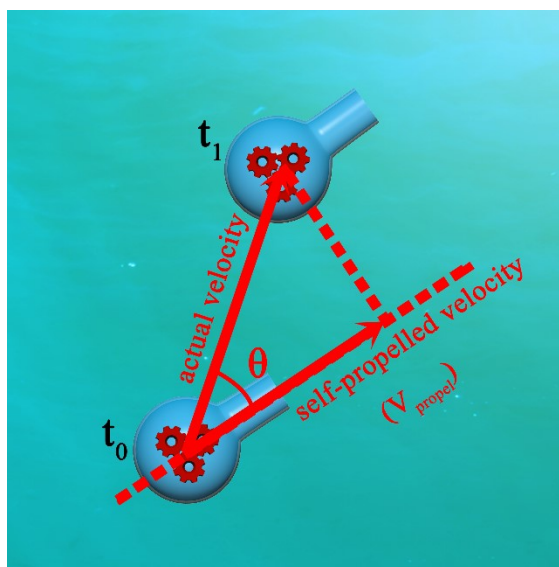

Figure S1. The method of the calculation of the self-propelled velocity of the flasklike colloidal motors.

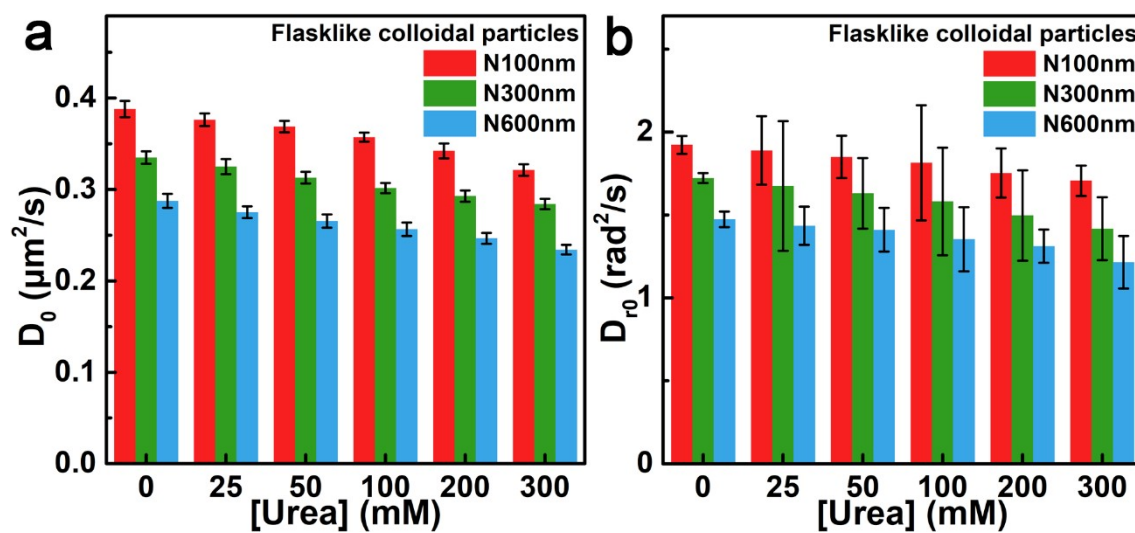

Figure S2. Translational (a) and rotational (b) diffusion coefficients of the Brownian motion of flasklike colloidal particles with different neck lengths in different urea concentrations.
